# Supplementary material for: A Comprehensive Assessment of Apigenin as an Antiproliferative, Proapoptotic, Antiangiogenic and Immunomodulatory Phytocompound
Source: PubMed Central journal article supplement (PMC6521017; doi:10.3390/nu11040858), 2019-04-16
Supplement: nutrients-11-00858-s001.pdf [file nutrients-11-00858-s001.pdf]

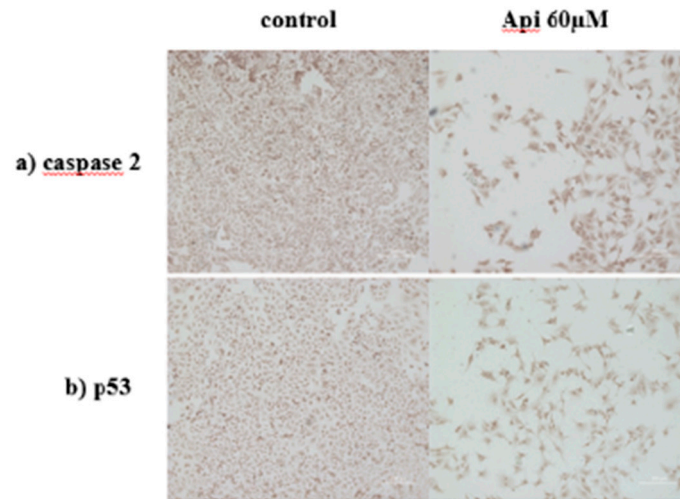

**Figure S1.** Expression of caspase 2 and p53 proteins after stimulation with Api 60 µM vs. Control.

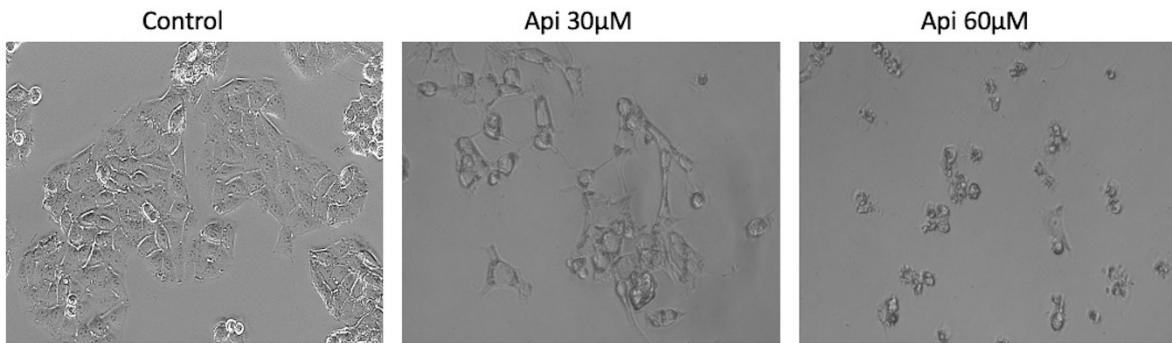

**Figure S2.** Morphological aspects of human melanoma A375 cells exposed to Api at concentrations of 30 µM and 60 µM during LDH assessment. Images were taken 72 h post-treatment.
